# Supplementary material
Source: publisher figshare collection journal article supplement (https://gsajournals.figshare.com/ndownloader/files/25894245)
Supplement: Supplementary file 1 [file 25894245]

## Sheet: Table S1
Table S1: Resources table of Drosophila melanogaster strains
Genetic background/control lines	Source	Identifier	Chromosome affected
Isogenic control line: w1118	Bloomington Drosophila Stock Center	BDSC: 3605 Flybase: FBst0003605	-
Isogenic control line: y[1] w[1]	Bloomington Drosophila Stock Center	BDSC: 1495; Flybase: FBst0001495	-
isogenic control line: y[1] w[67c23]	Bloomington Drosophila Stock Center	BDSC: 6599 Flybase: FBst0006599	-
Wild-type line: Oregon-R-C	Bloomington Drosophila Stock Center	BDSC: 5; Flybase: FBst0000005	-
Actin driver line: y1w*/P { Act5c - GAL4 } / CyO , y+	Bloomington Drosophila Stock Center	BDSC: 4414 Flybase: FBst0004414	2
Null mutants (candidate gene: mutant genotype tested)	Source	Identifier	Chromosome affected
shn: cn[1] shn[1] bw[1] sp[1]/CyO	Bloomington Drosophila Stock Center	BDSC: 3008 FBst0003008	2R
CG34417: PBac{WH}CG34417[f07824]	Excelixis	Excelixis: f07824 FBal0185678	X
FER: w[1118]; Mi{ET1}FER[MB08538]	Bloomington Drosophila Stock Center	BDSC: 29055 FBst0029055	3R
CG13404: PBac{WH}CG13404[f07827a], PBac{WH}f07827b	Excelixis	Excelixis: f07827 FBti0068329	X
CG34351: y[1] w[*]; Mi{y[+mDint2]=MIC}CG34351[MI14800]	Bloomington Drosophila Stock Center	BDSC: 59379 FBst0059379	2L
tara: w[1118]; tara[1]/TM3, Sb[1]	Bloomington Drosophila Stock Center	BDSC: 6403 FBst0006403	3R
DIP-ε: PBac{WH}DIP-ε[f04139]	Excelixis	Excelixis: f04139 FBti0051603	2L
CG31221: y[1] w[*]; Mi{y[+mDint2]=MIC}CG31221[MI00150]	Bloomington Drosophila Stock Center	BDSC: 30636 FBst0030636	3R
RhoGEF64C: w[1118]; Mi{ET1}RhoGEF64C[MB04730]	Bloomington Drosophila Stock Center	BDSC: 24220 FBst0024220	3L
IP3K2: IP3K2[wy-1]	Bloomington Drosophila Stock Center	BDSC: 168 FBst0000168	X
ich: w1118; P{EP}ichEP1156	Bloomington Drosophila Stock Center	BDSC: 16993 FBst0016993	3R
dally: w1118; PBac{810.P.FSVS-2}dallyCPTI004473	Kyoto Stock Center	Kyoto: 115624 FBst0324875	3L
CG32264: y1 w*; Mi{MIC}CG32264MI05237	Bloomington Drosophila Stock Center	BDSC :44143 FBst0044143	3L
Smr: w1118 P{GT1}SmrBG01648/FM7a	Bloomington Drosophila Stock Center	BDSC: 13116 FBst0013116	X
Pura: w[1118]; PBac{w[+mC]=WH}Pura[f01768]	Bloomington Drosophila Stock Center	BDSC: 18470 FBst0018470	3L
loco: w[1118]; PBac{w[+mC]=PB}CG31156[c00090]	Bloomington Drosophila Stock Center	BDSC: 10007 FBst0001007	3R
trh: P{PZ}trh10512 ry506/TM3, ryRK Sb1 Ser1	Bloomington Drosophila Stock Center	BDSC: 11747 FBst0011747	3L
AstC-R2: w1118; PBac{WH}AstC-R2f03116/TM6B, Tb+	Bloomington Drosophila Stock Center	BDSC: 18622 FBst0018622	3L
CG12075: w1118 P{XP}CG12075d09295	Bloomington Drosophila Stock Center	BDSC: 19312 FBst0019312	X
CG42673: y1 w*; Mi{MIC}CG42673MI00132	Bloomington Drosophila Stock Center	BDSC: 30630 FBst0030630	3L
dpr6: y1 w67c23; P{SUPor-P}dpr6KG07985 ry506	Bloomington Drosophila Stock Center	BDSC: 14679 FBst0014679	3L
CG42741: w1118; Mi{ET1}MB07723	Bloomington Drosophila Stock Center	BDSC: 25280 FBst0025280	2R
rk: rk4	Bloomington Drosophila Stock Center	BDSC: 3590 FBst0003590	2L
CG1544: w1118; PBac{WH}CG1544f06723	Bloomington Drosophila Stock Center	BDSC: 19003 FBst0019003	3R
RNAi lines (candidate gene: mutant genotype tested)	Source	Identifier	Chromosome affected
shn: y[1] sc[*] v[1]; P{y[+t7.7] v[+t1.8]=TRiP.HMS01167}attP2/TM3, Sb[1]	Bloomington Drosophila Stock Center	BDSC: 34689 FBst0034689	3L
CG34417: y[1] v[1]; P{y[+t7.7] v[+t1.8]=TRiP.HMJ22361}attP40	Bloomington Drosophila Stock Center	BDSC: 58278 FBst0058278	2L
FER: y[1] sc[*] v[1]; P{y[+t7.7] v[+t1.8]=TRiP.HMS00249}attP2	Bloomington Drosophila Stock Center	BDSC: 33375 FBst0033375	3L
CG13404: P{KK107484}VIE-260B	Vienna Drosophila Resource Center	VDRC: v108989 FBst0480782	2
CG34351: P{KK112048}VIE-260B	Vienna Drosophila Resource Center	VDRC: v109021 FBst0480813	2
tara: y[1] v[1]; P{y[+t7.7] v[+t1.8]=TRiP.JF01421}attP2	Bloomington Drosophila Stock Center	BDSC: 31634 FBst0031634	3L
DIP-ε: y[1] sc[*] v[1]; P{y[+t7.7] v[+t1.8]=TRiP.HMS01718}attP40	Bloomington Drosophila Stock Center	BDSC: 38936 FBst0038936	2L
GNBP-like3: y[1] sc[*] v[1]; P{y[+t7.7] v[+t1.8]=TRiP.HMC05108}attP40	Bloomington Drosophila Stock Center	BDSC: 60114 FBst0060114	2L
CG31221: y[1] sc[*] v[1]; P{y[+t7.7] v[+t1.8]=TRiP.HMS02350}attP2	Bloomington Drosophila Stock Center	BDSC: 41953 FBst0041953	3L
RhoGEF64C: y[1] v[1]; P{y[+t7.7] v[+t1.8]=TRiP.JF01604}attP2	Bloomington Drosophila Stock Center	BDSC: 31130 FBst0031130	3L
IP3K2: y[1] sc[*] v[1]; P{y[+t7.7] v[+t1.8]=TRiP.HMC02364}attP2/TM3, Sb[1]	Bloomington Drosophila Stock Center	BDSC: 55240 FBst0055240	3L
ich: y1 sc* v1; P{TRiP.HMS02762}attP2	Bloomington Drosophila Stock Center	BDSC: 44046 FBst0044046	3R
dally: y1 sc* v1; P{TRiP.HMS00905}attP2	Bloomington Drosophila Stock Center	BDSC: 33952 FBst0033952	3L
CG32264: y1 sc* v1; P{TRiP.HMC05840}attP2	Bloomington Drosophila Stock Center	BDSC: 64966 FBst0064966	3L
Smr: y1 sc* v1; P{TRiP.HMS00952}attP2	Bloomington Drosophila Stock Center	BDSC: 34528 FBst0034528	X
Pura: y[1] v[1]; P{y[+t7.7] v[+t1.8]=TRiP.HMJ22352}attP40	Bloomington Drosophila Stock Center	BDSC :58270 FBst0058270	2L
loco: y[1] sc[*] v[1]; P{y[+t7.7] v[+t1.8]=TRiP.HMS00455}attP2	Bloomington Drosophila Stock Center	BDSC: 32456 FBst0032456	3L
trh: y1 v1; P{TRiP.HMS00002}attP2	Bloomington Drosophila Stock Center	BDSC: 33612 FBst0033612	3L
AstC-R2: y1 v1; P{TRiP.JF01960}attP2	Bloomington Drosophila Stock Center	BDSC: 25940 FBst0025940	3L
CG12075: y1 sc* v1; P{TRiP.HMS02645}attP40	Bloomington Drosophila Stock Center	BDSC: 42952 FBst0042952	X
CG42673: P{KK101290}VIE-260B	Vienna Drosophila Resource Center	VDRC: v108571 FBst0480381	3L
dpr6: P{KK112634}VIE-260B	Vienna Drosophila Resource Center	VDRC: v103521 FBst0475379	3L
CG42741: y1 sc* v1; P{TRiP.HMC05577}attP40	Bloomington Drosophila Stock Center	BDSC: 64558 FBst0064558	2R
rk: y1 v1; P{TRiP.JF02678}attP2	Bloomington Drosophila Stock Center	BDSC: 31958 FBst0031958	2L
CG1544: y1 sc* v1; P{TRiP.HMS02694}attP2	Bloomington Drosophila Stock Center	BDSC: 43310 FBst0043310	3R

## Sheet: Table S2
Table S2: Male DGRP C. burnetii log transformed hazard ratios.
DGRP Line	log(HR)		DGRP Line	log(HR)		DGRP Line	log(HR)		DGRP Line	log(HR)
774	-0.718967		853	0.123852		358	0.416641		357	0.969789
738	-0.584693		897	0.125156		138	0.41797		28	1.05538
367	-0.542421		783	0.137987		304	0.420121		256	1.06595
705	-0.526075		100	0.1529		821	0.423737		313	1.13577
385	-0.519562		352	0.154424		42	0.425697		40	1.17202
801	-0.47991		310	0.156246		309	0.441066		805	1.22866
355	-0.461426		818	0.166134		748	0.444201		492	1.64355
315	-0.422968		361	0.167317		900	0.448088		Total Lines	Average
596	-0.399245		439	0.171141		808	0.45194		193	0.279872
383	-0.397397		852	0.179839		335	0.455454
374	-0.371509		440	0.180986		882	0.460296
362	-0.359519		88	0.184407		843	0.461649
426	-0.348916		57	0.186391		555	0.465977
589	-0.348528		153	0.187239		101	0.46938
630	-0.322211		405	0.188647		195	0.477266
716	-0.29388		908	0.193403		377	0.484869
732	-0.281581		406	0.195069		879	0.491222
365	-0.275888		83	0.198382		307	0.504607
427	-0.250109		761	0.205204		217	0.524526
301	-0.246187		373	0.207634		517	0.533136
176	-0.243592		855	0.214844		48	0.533264
390	-0.238899		93	0.215109		239	0.54083
161	-0.2356		832	0.219846		45	0.545802
837	-0.217312		386	0.222716		392	0.552911
318	-0.197637		502	0.228144		321	0.559188
181	-0.124649		409	0.229938		21	0.563955
303	-0.0977251		280	0.231215		790	0.565494
359	-0.0935572		375	0.243038		857	0.583652
320	-0.0858156		391	0.251395		395	0.59151
530	-0.0829674		348	0.259833		109	0.592399
776	-0.0700704		911	0.259833		850	0.594834
714	-0.0439757		319	0.261976		531	0.597256
105	-0.0391488		461	0.262214		810	0.621384
730	-0.034422		907	0.278525		627	0.621488
287	-0.0328734		381	0.285107		336	0.621903
535	-0.0328734		528	0.288473		235	0.631647
721	-0.020816		317	0.289589		360	0.635182
228	-0.0202241		399	0.291369		563	0.640581
894	-0.0195421		491	0.298416		227	0.643946
189	-0.0185892		38	0.307496		324	0.653309
861	-0.0133626		142	0.318898		849	0.65782
634	-0.0121997		437	0.320769		639	0.661434
884	-0.011441		513	0.323871		892	0.664078
41	-0.000347575		208	0.32838		819	0.685473
158	0.00518051		350	0.33163		799	0.6861
757	0.0182843		822	0.33385		31	0.693903
859	0.0318123		380	0.337459		129	0.695394
332	0.0507663		32	0.347525		371	0.732715
584	0.0523091		890	0.365113		820	0.738146
149	0.06032		443	0.36661		765	0.745231
356	0.0606978		59	0.369216		787	0.766785
566	0.0618293		136	0.374382		486	0.781971
712	0.0652061		595	0.377124		73	0.782329
812	0.0770043		237	0.379487		913	0.790074
370	0.0867157		509	0.390051		354	0.793022
338	0.0888446		229	0.391817		26	0.816241
75	0.0909631		379	0.394277		559	0.817235
707	0.0937718		703	0.395501		91	0.824386
508	0.110253		441	0.396025		727	0.849726
306	0.114277		177	0.396199		804	0.85691
397	0.116608		646	0.407731		551	0.871806
382	0.11694		69	0.412124		786	0.902329

## Sheet: Table S3
Table S3: Female DGRP C. burnetii log transformed hazard ratios.
DGRP Line	log(HR)		DGRP Line	log(HR)		DGRP Line	log(HR)		DGRP Line	log(HR)
705	-0.713993		217	0.0358298		324	0.295567		559	0.816109
584	-0.705754		406	0.0406023		439	0.302764		320	0.84161
362	-0.652475		461	0.0449315		563	0.318689		91	0.881556
318	-0.559091		555	0.0449315		399	0.319314		21	0.908163
589	-0.547907		45	0.049218		177	0.321598		93	0.929061
714	-0.482672		287	0.0526939		375	0.322219		105	0.940815
820	-0.479647		757	0.0576661		595	0.322426		627	0.982859
426	-0.439376		321	0.0610753		352	0.3485		808	1.04493
228	-0.428641		59	0.0674428		142	0.351216		83	1.20003
355	-0.409047		229	0.071882		551	0.351216		Total Lines	Average
181	-0.402744		900	0.0860037		850	0.353724		195	0.194156
535	-0.36261		256	0.0895519		395	0.356408
776	-0.33762		100	0.0941216		796	0.361917
819	-0.309893		313	0.102434		42	0.374565
303	-0.298864		738	0.106191		765	0.384891
821	-0.269864		911	0.109579		890	0.392345
383	-0.264241		894	0.113943		812	0.394977
304	-0.24071		332	0.121888		195	0.400365
517	-0.229074		176	0.126781		852	0.404149
712	-0.220909		799	0.127105		748	0.407901
837	-0.21261		390	0.1329		57	0.408579
397	-0.206769		310	0.137671		371	0.415307
707	-0.200177		884	0.143639		492	0.41797
158	-0.181444		783	0.146438		377	0.419295
907	-0.169091		861	0.148294		486	0.436799
513	-0.168642		319	0.150142		391	0.443576
365	-0.143513		350	0.150142		129	0.448861
239	-0.139662		810	0.15412		639	0.452247
801	-0.124823		373	0.158664		28	0.454692
348	-0.123551		853	0.16346		149	0.461348
892	-0.121191		908	0.169674		360	0.463296
596	-0.113679		32	0.171434		317	0.465085
385	-0.110194		509	0.177825		358	0.468052
386	-0.104246		443	0.180986		787	0.469233
41	-0.100179		48	0.180986		857	0.473487
354	-0.0993052		382	0.181844		367	0.474799
505	-0.0988142		40	0.182985		737	0.475381
646	-0.0927499		189	0.187239		716	0.477989
409	-0.0819697		75	0.187239		790	0.480151
280	-0.0798767		336	0.188366		357	0.488692
761	-0.0746363		730	0.191171		38	0.49038
359	-0.0694585		237	0.192846		227	0.52009
374	-0.0537934		441	0.192846		437	0.544068
301	-0.040434		818	0.195623		307	0.546172
161	-0.0355518		502	0.200577		405	0.578754
69	-0.0347512		721	0.205204		88	0.585912
822	-0.0285386		427	0.21801		235	0.605413
379	-0.0261797		208	0.220108		440	0.608419
370	-0.0236042		727	0.224533		879	0.621384
804	-0.0216825		855	0.230704		786	0.623973
335	-0.0163737		361	0.235023		306	0.632356
630	-0.0106837		153	0.248219		392	0.643156
774	-0.010061		508	0.251151		109	0.651859
913	-0.00970555		309	0.254306		101	0.677516
356	-0.00952795		380	0.255514		528	0.72746
732	-0.00872961		31	0.259116		340	0.735279
531	0.00173371		859	0.262451		634	0.735279
315	0.0094509		73	0.273233		566	0.762378
26	0.0136797		832	0.274158		849	0.763877
381	0.0136797		338	0.291591		703	0.764326
136	0.0187005		805	0.292699		882	0.788239
897	0.0244857		843	0.292699		491	0.789228

## Sheet: Table S4
Table S4: Combined DGRP C. burnetii log transformed hazard ratios.
DGRP Line	log(male HR)	log(female HR)		DGRP Line	log(male HR)	log(female HR)		DGRP Line	log(male HR)	log(female HR)
21	0.563955	0.908163		374	-0.371509	-0.0537934		821	0.423737	-0.269864
26	0.816241	0.0136797		375	0.243038	0.322219		822	0.33385	-0.0285386
28	1.05538	0.454692		377	0.484869	0.419295		832	0.219846	0.274158
31	0.693903	0.259116		379	0.394277	-0.0261797		837	-0.217312	-0.21261
32	0.347525	0.171434		380	0.337459	0.255514		843	0.461649	0.292699
38	0.307496	0.49038		381	0.285107	0.0136797		849	0.65782	0.763877
40	1.17202	0.182985		382	0.11694	0.181844		850	0.594834	0.353724
41	-0.000347575	-0.100179		383	-0.397397	-0.264241		852	0.179839	0.404149
42	0.425697	0.374565		385	-0.519562	-0.110194		853	0.123852	0.16346
45	0.545802	0.049218		386	0.222716	-0.104246		855	0.214844	0.230704
48	0.533264	0.180986		390	-0.238899	0.1329		857	0.583652	0.473487
57	0.186391	0.408579		391	0.251395	0.443576		859	0.0318123	0.262451
59	0.369216	0.0674428		392	0.552911	0.643156		861	-0.0133626	0.148294
69	0.412124	-0.0347512		395	0.59151	0.356408		879	0.491222	0.621384
73	0.782329	0.273233		397	0.116608	-0.206769		882	0.460296	0.788239
75	0.0909631	0.187239		399	0.291369	0.319314		884	-0.011441	0.143639
83	0.198382	1.20003		405	0.188647	0.578754		890	0.365113	0.392345
88	0.184407	0.585912		406	0.195069	0.0406023		892	0.664078	-0.121191
91	0.824386	0.881556		409	0.229938	-0.0819697		894	-0.0195421	0.113943
93	0.215109	0.929061		426	-0.348916	-0.439376		897	0.125156	0.0244857
100	0.1529	0.0941216		427	-0.250109	0.21801		900	0.448088	0.0860037
101	0.46938	0.677516		437	0.320769	0.544068		907	0.278525	-0.169091
105	-0.0391488	0.940815		439	0.171141	0.302764		908	0.193403	0.169674
109	0.592399	0.651859		440	0.180986	0.608419		911	0.259833	0.109579
129	0.695394	0.448861		441	0.396025	0.192846		913	0.790074	-0.00970555
136	0.374382	0.0187005		443	0.36661	0.180986		Total Lines	Average (male)	Average (female)
142	0.318898	0.351216		461	0.262214	0.0449315		191	0.281048	0.190506
149	0.06032	0.461348		486	0.781971	0.436799
153	0.187239	0.248219		491	0.298416	0.789228
158	0.00518051	-0.181444		492	1.64355	0.41797
161	-0.2356	-0.0355518		502	0.228144	0.200577
176	-0.243592	0.126781		508	0.110253	0.251151
177	0.396199	0.321598		509	0.390051	0.177825
181	-0.124649	-0.402744		513	0.323871	-0.168642
189	-0.0185892	0.187239		517	0.533136	-0.229074
195	0.477266	0.400365		528	0.288473	0.72746
208	0.32838	0.220108		531	0.597256	0.00173371
217	0.524526	0.0358298		535	-0.0328734	-0.36261
227	0.643946	0.52009		551	0.871806	0.351216
228	-0.0202241	-0.428641		555	0.465977	0.0449315
229	0.391817	0.071882		559	0.817235	0.816109
235	0.631647	0.605413		563	0.640581	0.318689
237	0.379487	0.192846		566	0.0618293	0.762378
239	0.54083	-0.139662		584	0.0523091	-0.705754
256	1.06595	0.0895519		589	-0.348528	-0.547907
280	0.231215	-0.0798767		595	0.377124	0.322426
287	-0.0328734	0.0526939		596	-0.399245	-0.113679
301	-0.246187	-0.040434		627	0.621488	0.982859
303	-0.0977251	-0.298864		630	-0.322211	-0.0106837
304	0.420121	-0.24071		634	-0.0121997	0.735279
306	0.114277	0.632356		639	0.661434	0.452247
307	0.504607	0.546172		646	0.407731	-0.0927499
309	0.441066	0.254306		703	0.395501	0.764326
310	0.156246	0.137671		705	-0.526075	-0.713993
313	1.13577	0.102434		707	0.0937718	-0.200177
315	-0.422968	0.0094509		712	0.0652061	-0.220909
317	0.289589	0.465085		714	-0.0439757	-0.482672
318	-0.197637	-0.559091		716	-0.29388	0.477989
319	0.261976	0.150142		721	-0.020816	0.205204
320	-0.0858156	0.84161		727	0.849726	0.224533
321	0.559188	0.0610753		730	-0.034422	0.191171
324	0.653309	0.295567		732	-0.281581	-0.00872961
332	0.0507663	0.121888		738	-0.584693	0.106191
335	0.455454	-0.0163737		748	0.444201	0.407901
336	0.621903	0.188366		757	0.0182843	0.0576661
338	0.0888446	0.291591		761	0.205204	-0.0746363
348	0.259833	-0.123551		765	0.745231	0.384891
350	0.33163	0.150142		774	-0.718967	-0.010061
352	0.154424	0.3485		776	-0.0700704	-0.33762
354	0.793022	-0.0993052		783	0.137987	0.146438
355	-0.461426	-0.409047		786	0.902329	0.623973
356	0.0606978	-0.00952795		787	0.766785	0.469233
357	0.969789	0.488692		790	0.565494	0.480151
358	0.416641	0.468052		799	0.6861	0.127105
359	-0.0935572	-0.0694585		801	-0.47991	-0.124823
360	0.635182	0.463296		804	0.85691	-0.0216825
361	0.167317	0.235023		805	1.22866	0.292699
362	-0.359519	-0.652475		808	0.45194	1.04493
365	-0.275888	-0.143513		810	0.621384	0.15412
367	-0.542421	0.474799		812	0.0770043	0.394977
370	0.0867157	-0.0236042		818	0.166134	0.195623
371	0.732715	0.415307		819	0.685473	-0.309893
373	0.207634	0.158664		820	0.738146	-0.479647

## Sheet: Table S5
Table S5: Top SNPs from GWA analyses using DGRP hazard ratios.
Genome Assembly BDGP R5/dm3
Chromosome	Position	Type	Minor allele	Major allele	Ref allele	MAF	Missing Lines	Analysis	Effect	P-value	Gene Association
2L	4702261	SNP intron	T	C	C	0.08242	13	Female	-0.1953	8.644e-06	CG34351
2L	6394872	SNP exon; synonymous	A	G	G	0.2346	14	Male	-0.1504	2.92355e-06	DIP-ε
2L	6393523	SNP intron	G	C	C	0.1739	32	Male	-0.1762	3.37044e-06	DIP-ε
2L	13999491	SNP intron	A	C	C	0.3214	23	Difference	-0.1453	8.35268e-06	rk
2R	7099616	SNP exon; synonymous	G	A	A	0.09574	7	Female	-0.2072	3.186e-07	shn
2R	7100431	SNP exon; nonsynonymous	C	G	G	0.1005	6	Female	-0.1946	8.578e-07	shn
2R	7095790	SNP exon; nonsynonymous	A	T	T	0.08947	5	Female	-0.1955	2.673e-06	shn
2R	7086245	SNP intron	A	G	G	0.1117	7	Female	-0.1734	4.836e-06	shn
2R	16089856	SNP intergenic	T	C	C	0.1341	16	Female	-0.1634	4.975e-06	-
2R	7095231	SNP intron	T	A	A	0.09424	4	Female	-0.1834	6.31e-06	shn
2R	7095233	SNP intron	T	C	C	0.09424	4	Female	-0.1834	6.31e-06	shn
2R	7095705	SNP intron	T	C	C	0.123	8	Female	-0.1646	3.785e-06	shn
2R	7095228	SNP intron	G	C	C	0.09474	5	Female	-0.183	6.91e-06	shn
2R	7095229	SNP intron	T	G	G	0.08466	6	Female	-0.1871	1.11e-05	shn
2R	7083290	SNP intron	A	T	T	0.1882	9	Female	-0.1339	9.119e-06	shn
2R	16414194	SNP exon; synonymous	T	C	T	0.2722	13	Male	-0.1383	6.13997e-06	GNBP-like3
2R	14136876	SNP intergenic	C	T	T	0.3351	8	Male	0.1241	1.33909e-05	-
2R	18904195	SNP intron	T	C	C	0.09677	5	Difference	0.2225	5.32811e-06	CG42741
2R	18904156	SNP intron	T	G	G	0.09189	6	Difference	0.2231	8.96936e-06	CG42741
3L	3780410	SNP intron	A	C	C	0.1905	27	Female	0.1387	6.653e-06	CG32264
3L	7623460	SNP in lncRNA within intron	A	G	G	0.4108	8	Male	0.1298	1.85667e-06	Pura
3L	7623383	SNP intron	A	C	C	0.4064	6	Male	0.1293	1.87277e-06	Pura
3L	19429344	SNP intergenic	A	G	G	0.2265	12	Male	-0.1486	4.55566e-06	-
3L	19429336	SNP intergenic	A	G	G	0.2346	14	Male	-0.1473	4.72808e-06	-
3L	8151508	SNP intron	T	A	A	0.2128	5	Male	-0.1485	4.97347e-06	CG42455
3L	5979177	SNP intergenic	C	G	G	0.1937	2	Male	-0.1523	5.19373e-06	-
3L	5879572	SNP intergenic	T	A	A	0.105	12	Male	-0.1996	6.61797e-06	-
3L	18975906	SNP intergenic	T	A	A	0.07784	26	Male	0.2371	7.03147e-06	-
3L	4738164	SNP intron	A	C	C	0.1492	12	Male	-0.1709	7.40007e-06	RhoGef64C
3L	7623383	SNP intron	A	C	C	0.4054	6	Average	0.1089	2.20745e-07	Pura
3L	7623460	SNP in lncRNA within intron	A	G	G	0.4098	8	Average	0.1081	3.02652e-07	Pura
3L	8851042	SNP intron	A	C	C	0.467	9	Average	-0.09467	6.73071e-06	dally
3L	3750617	SNP intron	C	A	A	0.3543	16	Average	0.1002	7.54231e-06	CG32264
3L	5979177	SNP intergenic	C	G	G	0.1958	2	Average	-0.1158	8.14686e-06	-
3L	3750549	SNP intron	A	G	G	0.3676	6	Average	0.09544	9.9623e-06	CG32264
3L	10381715	SNP intergenic	T	C	C	0.07487	4	Difference	0.2816	2.20188e-07	-
3L	376337	SNP intron	G	A	A	0.06383	3	Difference	-0.2953	4.34849e-07	trh
3L	18481371	SNP exon; synonymous	A	G	G	0.3333	14	Difference	-0.1512	1.38196e-06	AstC-R2
3L	18481389	SNP exon; synonymous	T	C	C	0.3539	13	Difference	-0.1477	1.63729e-06	AstC-R2
3L	9540740	SNP intron	C	T	C	0.07937	2	Difference	0.2459	3.45578e-06	CG42673
3L	10044744	SNP intron	G	T	T	0.09497	12	Difference	0.232	3.83128e-06	dpr6
3L	379888	SNP intron	A	C	C	0.07487	4	Difference	-0.2486	5.69223e-06	trh
3L	18481950	SNP 5'UTR	G	T	T	0.2727	15	Difference	-0.1499	7.07693e-06	AstC-R2
3R	5218712	intron insertion	A	ACATA	A	0.2659	22	Female	-0.1304	3.182e-06	FER
3R	12079260	SNP intron	C	A	A	0.4068	18	Female	-0.1108	6.02e-06	tara
3R	18456211	SNP in asRNA within intron/exon	T	C	C	0.1475	10	Male	-0.1804	2.03432e-06	loco
3R	15278653	SNP intron	A	G	G	0.3169	10	Male	-0.131	6.39927e-06	CG31221
3R	4787301	SNP intron	T	C	C	0.3836	32	Average	0.1127	9.28827e-07	ich
3R	18456211	SNP in asRNA within intron/exon	T	C	C	0.1492	10	Average	-0.1393	2.24619e-06	loco
3R	18456214	SNP in asRNA within intron/exon	T	C	C	0.1517	13	Average	-0.1375	3.21523e-06	loco
3R	23222093	SNP intron	G	A	A	0.1749	8	Average	-0.1218	9.87835e-06	side
3R	16330083	SNP intergenic; 1259 bp upstream	T	A	T	0.2829	39	Difference	0.1642	3.66693e-06	MtnB
3R	16330083	SNP intergenic; 427 bp upstream	T	A	T	0.2829	39	Difference	0.1642	3.66693e-06	Or92a
3R	25166019	SNP intergenic	T	C	C	0.05291	2	Difference	0.288	7.00933e-06	-
3R	26693892	SNP intron	G	A	A	0.05978	7	Difference	-0.275	7.34072e-06	Cpr100A
3R	27026419	SNP intron	T	G	G	0.1602	10	Difference	0.1772	9.37119e-06	CG1544
X	6434578	SNP intergenic; 226 bp upstream	A	C	C	0.4656	6	Female	-0.1165	9.971e-07	CG34417
X	14471815	SNP intergenic	G	A	A	0.4136	4	Female	0.1112	3.642e-06	-
X	14160126	SNP exon; synonymous	A	G	G	0.2579	5	Female	0.1213	8.446e-06	CG13404
X	6434535	SNP intergenic; 269 bp upstream	C	T	T	0.4262	12	Female	-0.1079	1.033e-05	CG34417
X	13210675	SNP intron	G	A	G	0.1071	25	Male	-0.2042	7.4689e-06	IP3K2
X	13210675	SNP intron	G	A	G	0.1084	25	Average	-0.1588	6.98006e-06	IP3K2
X	9884708	SNP intron	G	A	A	0.08995	2	Average	-0.1606	8.14682e-06	CG32694
X	12610055	SNP intron	T	C	C	0.2599	14	Average	0.1078	8.92412e-06	Smr
X	6434578	SNP intergenic; 226 bp upstream	A	C	C	0.4703	6	Average	-0.09223	9.87434e-06	CG34417
X	8751630	SNP intron	G	A	G	0.3421	1	Difference	0.1412	2.72301e-06	CG12075
X	8751631	SNP intron	T	A	T	0.3368	1	Difference	0.1414	2.86428e-06	CG12075
X	8751555	SNP intron	A	G	A	0.3387	5	Difference	0.1381	6.12384e-06	CG12075
X	8751598	SNP intron deletion	TATAT	T	TATAT	0.3797	4	Difference	0.1318	9.34711e-06	CG12075

## Sheet: Table S6
Table S6. Survival of candidate null mutant genes compared to genetic background controls
Genotype	Sex	Analysis (GWA)	Hazard ratio	P-value	Log-rank test
y1 w67c23	females	control	0.8216	0.164	ns
y1 w67c23	males	control	1.794	<0.0001	**
shn1	females	female-only	0.4441	<0.0001	**
dpr6KG07985 ry506	females	difference	1.204	0.4202	ns
dpr6KG07985 ry507	males	difference	2.607	<0.0001	**
y1 w1	females	control	0.8387	0.1696	ns
y1 w1	males	control	0.9871	0.9129	ns
CG34351MI14800	females	female-only	1.913	0.0025	*
CG31221MI00150	males	male-only	1.614	0.0004	*
CG32264MI05237	females	average	0.6197	0.1006	ns
CG32264MI05238	males	average	0.9814	0.9228	ns
CG42673MI00132	females	difference	2.228	<0.0001	**
CG42673MI00132	males	difference	1.602	0.0006	*
w1118	females	control	1.328	0.0333	ns
w1118	males	control	2.99	<0.0001	**
FERMB08538	females	female-only	3.732	<0.0001	**
CG13404f07827b	females	female-only	1.294	0.2737	ns
tara1	females	female-only	3.283	<0.0001	**
DIP-εf04139	males	male-only	2.757	0.0009	*
RhoGEF64CMB04730	males	male-only	0.5131	0.0014	*
ichEP1156	females	average	1.624	0.0006	*
ichEP1157	males	average	0.7784	0.0905	ns
dallyCPTI004473	females	average	1.284	0.0729	ns
dallyCPTI004474	males	average	1.347	0.0729	ns
SmrBG01648/FM7a	females	average	0.6986	0.029	ns
SmrBG01648/FM7a	males	average	0.9834	0.9834	ns
CG34417f07824	females	average	1.396	0.0235	ns
CG34417f07825	males	average	1.873	<0.0001	**
IP3K2wy-1	females	average	0.4756	0.0011	*
IP3K2wy-1	males	average	0.2448	<0.0001	**
lococ00090	females	average	0.6983	0.0366	ns
lococ00090	males	average	1.133	0.5563	ns
Puraf01768	females	average	2.238	<0.0001	**
Puraf01768	males	average	5.978	<0.0001	**
AstC-R2f03116/TM6B, Tb+	females	difference	1.055	0.8295	ns
AstC-R2f03116/TM6B, Tb+	males	difference	0.814	0.3517	ns
CG12075d09295	females	difference	0.6628	0.0038	*
CG12075d09295	males	difference	1.516	0.0014	*
CG42741MB07723	females	difference	1.22	0.1696	ns
CG42741MB07724	males	difference	3.051	<0.0001	**
CG1544f06723	females	difference	2.543	<0.0001	**
CG1544f06724	males	difference	2.634	<0.0001	**
Oregon-R	females	control	3.363	<0.0001	**
Oregon-R	males	control	1.84	<0.0001	**
trh10512 ry506/TM3, ryRK Sb1 Ser1	females	difference	2.846	<0.0001	**
trh10512 ry506/TM3, ryRK Sb1 Ser2	males	difference	2.18	<0.0001	**
rk4	females	difference	2.077	<0.0001	**
rk4	males	difference	1.346	0.0384	ns
ns = P>0.01, *P<0.01 or **P<0.0001

## Sheet: Table S7
Table S7. Survival of candidate RNAi knockdown genes compared to genetic background controls
Genotype	Sex	Analysis (GWA)	Hazard ratio	P-value	Log-rank test
shn control	females	female-only	1.044	0.8141	ns
shn RNAi	females	female-only	1.398	0.02	ns
FER control	females	female-only	0.8198	0.2525	ns
FER RNAi	females	female-only	0.5641	0.0004	*
CG13404 control	females	female-only	1.19	0.3914	ns
CG13404 RNAi	females	female-only	2.511	<0.0001	**
CG34351 control	females	female-only	0.9463	0.7338	ns
CG34351 RNAi	females	female-only	0.9866	0.9377	ns
tara control	females	female-only	1.667	0.0123	ns
tara RNAi	females	female-only	1.607	0.0025	*
DIP-ε control	males	male-only	1.749	0.018	ns
DIP-ε RNAi	males	male-only	0.3787	0.0014	*
CG31221 control	males	male-only	2.997	<0.0001	**
CG31221 RNAi	males	male-only	3.865	<0.0001	**
RhoGEF64C control	males	male-only	0.5976	0.0374	ns
RhoGEF64C RNAi	males	male-only	2.012	0.013	ns
GNBP-like3 control	males	male-only	3.945	0.1832	ns
GNBP-like3 RNAi	males	male-only	2.906	0.0546	ns
dally control	females	average	2.122	0.0107	ns
dally RNAi	females	average	1.272	0.3049	ns
dally control	males	average	0.3683	0.0002	*
dally RNAi	males	average	1.351	0.0849	ns
CG32264 control	females	average	0.8718	0.4323	ns
CG32264 RNAi	females	average	0.8162	0.2096	ns
CG32264 control	males	average	0.7878	0.3253	ns
CG32264 RNAi	males	average	1.106	0.6634	ns
CG34417 control	females	average	0.4458	0.0017	*
CG34417 RNAi	females	average	0.4183	0.0089	*
CG34417 control	males	average	0.3493	0.0049	*
CG34417 RNAi	males	average	0.5707	0.0991	ns
IP3K2 control	females	average	1.939	0.0036	*
IP3K2 RNAi	females	average	6.483	<0.0001	**
IP3K2 control	males	average	4.5	<0.0001	**
IP3K2 RNAi	males	average	3.626	<0.0001	**
Pura control	females	average	0.3906	0.0023	*
Pura RNAi	females	average	0.6989	0.3041	ns
Pura control	males	average	0.9873	0.9696	ns
Pura RNAi	males	average	0.6951	0.1607	ns
AstC-R2 control	females	difference	1.919	0.1096	ns
AstC-R2 RNAi	females	difference	1.324	0.4367	ns
AstC-R2 control	males	difference	2.192	0.0742	ns
AstC-R2 RNAi	males	difference	3.467	0.0202	ns
CG12075 control	females	difference	1.245	0.2393	ns
CG12075 RNAi	females	difference	1.012	0.9428	ns
CG12075 control	males	difference	1.108	0.6146	ns
CG12075 RNAi	males	difference	1.07	0.6786	ns
CG42673 control	females	difference	1.249	0.1934	ns
CG42673 RNAi	females	difference	1.131	0.5302	ns
CG42673 control	males	difference	0.2658	<0.0001	**
CG42673 RNAi	males	difference	0.6301	0.0119	ns
dpr6 control	females	difference	0.893	0.4583	ns
dpr6 RNAi	females	difference	0.8541	0.3109	ns
dpr6 control	males	difference	1.875	<0.0001	**
dpr6 RNAi	males	difference	1.596	0.0072	*
CG42741 control	females	difference	0.1115	<0.0001	**
CG42741 RNAi	females	difference	0.4871	0.0396	ns
CG42741 control	males	difference	5.94	0.0081	*
CG42741 RNAi	males	difference	1.457	0.0146	ns
rk control	females	difference	0.4021	0.0004	*
rk RNAi	females	difference	0.822	0.3556	ns
rk control	males	difference	0.5716	0.119	ns
rk RNAi	males	difference	1.264	0.1704	ns
CG1544 control	females	difference	3.033	<0.0001	**
CG1544 RNAi	females	difference	3.317	<0.0001	**
CG1544 control	males	difference	2.619	0.0054	*
CG1544 RNAi	males	difference	1.233	0.1657	ns
ns = P>0.01, *P<0.01 or **P<0.0001
